# Supplementary material for: Unprecedented highly efficient capture of glycopeptides by Fe3O4@Mg-MOF-74 core–shell nanoparticles
Source: Royal Society of Chemistry journal article supplement (doi:10.1039/c7cc00447h), 2017-01-01
Supplement: c7cc00447h1.pdf [file c7cc00447h1.pdf]

Electronic Supporting Information for:

## **Unprecedented High Efficient Capture of Glycopeptides by $\text{Fe}_3\text{O}_4$ @Mg-MOF-74 core-shell nanoparticles**

Jie Li,<sup>a</sup> Jiaxi Wang,<sup>b</sup> Yun Ling<sup>a,\*</sup>, Zhenxia Chen<sup>a</sup>, Mingxia Gao,<sup>b</sup> Xiangmin Zhang,<sup>b</sup> and  
Yaming Zhou<sup>a,\*</sup>

<sup>a</sup> Shanghai Key Laboratory of Molecular Catalysis and Innovative Materials, Department of Chemistry, Fudan University, Shanghai, 200433, China.

<sup>b</sup> Department of Chemistry and Institutes of Biomedical Sciences, Fudan University, Shanghai 200433, China.

To whom correspondence should be addressed:

yunling@fudan.edu.cn (Prof. Ling Y.),

ymzhou@fudan.edu.cn (Prof. Zhou YM);

## Experimental Section

**Materials and chemicals:** Horse-radish peroxidase (HRP), 2,5-dihydroxyterephthalic acid (H<sub>4</sub>DOT), ammonium bicarbonate (NH<sub>4</sub>HCO<sub>3</sub>), bovine serum albumin (BSA), trypsin (from bovine pancreas), trifluoroacetic acid (TFA) and 2,5-dihydroxybenzoic acid (DHB) were purchased from Sigma Chemical. Acetonitrile (ACN) was purchased from Merck (Darmstadt, Germany). Human serum was obtained from Zhongshan hospital (Shanghai, China). Peptide-N-glycosidase (PNGase F) was obtained from New England Biolabs. Milli-Q water was used in all experiment process. All other reagents were obtained from Sinopharm Chemical Reagent (Shanghai, China).

**Synthesis of Fe<sub>3</sub>O<sub>4</sub>@Mg-MOF-74 nanoparticles:** The magnetite particles (Fe<sub>3</sub>O<sub>4</sub>) were hydrothermally synthesized.<sup>1</sup> The obtained Fe<sub>3</sub>O<sub>4</sub> nanoparticles (0.05g) and Mg(NO<sub>3</sub>)<sub>2</sub> were re-dispersed in the solution of DMF (67.5 mL), ethanol (4.5 mL) and water (4.5 mL) by ultrasonication for 30 min. After that, H<sub>4</sub>DOT (0.250 g, 1.26 mmol) was added and sonicated for another 30 min. The mixture was sealed in a Teflon-lined stainless-steel autoclave and heated at 125 °C about 5 h. Finally, the resulting nanoparticles were collected by magnetic separation and washed with DMF and ethanol (3 × 10 mL), respectively. The obtained products were dried in vacuum at 50 °C for further use.

**Synthesis of Fe<sub>3</sub>O<sub>4</sub>@Mg-MOF-74-II nanoparticles:** The procedure for preparation of the composite is similar to the synthesis of Fe<sub>3</sub>O<sub>4</sub>@Mg-MOF-74 except that the 3,3'-dihydroxy-[1,1'-biphenyl]-4,4'-dicarboxylic acid was used as the ligand.

**Synthesis of Fe<sub>3</sub>O<sub>4</sub>@DOT:** The procedure is similar to that of Fe<sub>3</sub>O<sub>4</sub>@Mg-MOF-74 without Mg(NO<sub>3</sub>)<sub>2</sub>•6H<sub>2</sub>O.

**Synthesis of Fe<sub>3</sub>O<sub>4</sub>@Mg/DOT:** The procedure is similar to that of Fe<sub>3</sub>O<sub>4</sub>@Mg-MOF-74 except that the reaction temperature is settled to be 90 °C, where Mg-MOF-74 could not be generated.

**Characterization:** Transmission electron microscopy (TEM) images and energy dispersive X-ray (EDX) spectra were taken on a JEOL 2011 microscope (Japan) operated at 200 kV. Fourier-transform infrared (FT-IR) spectra were tested on a Nicolet Fourier spectrophotometer. Powder X-ray Powder diffraction (XRD) patterns were collected on a Bruker D8 X-ray diffractometer with Cu K $\alpha$  radiation. Nitrogen sorption isotherms were measured at 77 K on ASAP 2020 analyzer. The Brunauer-Emmett-Teller (BET) method was utilized to calculate the specific surface area.

**Sample preparation.** The HRP standard glycoprotein was dissolved in 25 mM NH<sub>4</sub>HCO<sub>3</sub> buffer, the solution was heated at 100 °C for 10 min. After the solution cooled to 25 °C, trypsin was added into the solution at an enzyme/substrate ratio of 1:50 (w/w) at 37 °C with overnight shaking. The treating process of human serum is the same as previously reported method.<sup>2</sup> Briefly, the serum was thawed on the ice, and 1  $\mu$ L of serum sample was diluted with 20  $\mu$ L ultrapure water. The mixture was treated with 10 mM DTT at 60 °C for 30 min and alkylated with 20 mM IAA at 37 °C for 1 h in the dark. In order to obtain the serum protein sample, acetone solution was added with a protein solution/acetone ratio of 1:6 (v/v) at -20 °C overnight. Prior to digestion, the solution was diluted with 50 mM NH<sub>4</sub>HCO<sub>3</sub> until the protein final concentration reaches 2 mg/mL. Then, the solution was digested with trypsin (protein: enzyme = 30:1, w/w) for 16 h under shaking.

**Glycopeptides enrichment:** To evaluate the efficiency of materials for enrichment of glycopeptides, the composites (10 mg/ml, 50  $\mu$ L) were first washed with the loading buffer (90% ACN and 1% TFA aqueous solution (v/v)) three times, followed by HRP digestion or

peptides mixture were added. After incubated for 45 min at 37 °C, the supernatant and materials were separated with the help of magnet, then the materials were rinsed with loading buffer (200 µL) for 3 times. Subsequently, 10 µL of 30 % ACN and 0.1% TFA aqueous solution (v/v) was added into and vibrated for 15 min to elute the enriched glycopeptides.

**Optimizing of enrichment conditions:** The amount of the composite and the time of reaction were optimized, respectively. Different concentrations of ACN and TFA solution were applied to the loading buffer. All these optimizing procedure were investigated with trypsin digest of  $10^{-6}$  M HRP.

**MALDI-TOF-MS analysis.** The glycopeptides sample elution (1 µL) was deposited on the target and then another DHB aqueous solution was introduced as a matrix. MALDI-TOF-MS experiments were performed in positive ion mode on a 5800 Proteomics Analyzer (Applied Biosystems, Framingham, MA, USA) with the Nd-YAG laser at 383 nm, a repetition rate of 200 Hz and an acceleration voltage of 20 kV.

**Nano-Liquid chromatography tandem mass spectrometry (Nano-LC–MS/MS) analysis of glycopeptides.** Glycopeptides enriched from human serum were re-suspended with 12 µL solvent A (A: water with 0.1% formic acid; B: ACN with 0.1% formic acid) and then separated by nanoLC and analyzed by on-line electrospray tandem mass spectrometry. The experiments were performed on a Nano Aquity UPLC system (Waters Corporation, Milford, MA) connected to a quadrupole-Orbitrap mass spectrometer (Q-Exactive, Thermo Fisher Scientific, Bremen, Germany) equipped with an online nano-electrospray ion source. 8 µL peptide sample was loaded onto the trap column (Thermo Scientific Acclaim PepMap C18, 100µm x 2cm), with a flow of 10µL/min for 3 min and subsequently separated on the analytical column (Acclaim PepMap C18, 75µm x 50cm) with a linear gradient, from 2% B to 45% B in 75 min. The column was re-equilibrated at initial conditions for 15 min. The

column flow rate was maintained at 300 nL/min and column temperature was maintained at 40 °C. The electrospray voltage of 1.8 kV versus the inlet of the mass spectrometer was used.

The Q-Exactive mass spectrometer was operated in the data-dependent mode to switch automatically between MS and MS/MS acquisition. Survey full-scan MS spectra ( $m/z$  350-1600) were acquired with a mass resolution of 70K, followed by twenty sequential high energy collisional dissociation (HCD) MS/MS scans with a resolution of 17.5K. For MS, the automatic gain control (AGC) was set to 1000 000 ions, with maximum accumulation times of 20 ms. For MS/MS, precursor ions were activated using 30% normalized collision energy, an isolation window of 2  $m/z$  and the AGC was set to 100 000 ions, with maximum accumulation time of 120 ms. Single charge state was rejected and dynamic exclusion was used with one microscan and 20 s exclusion duration.

**Database search.** Tandem mass spectra were extracted by Proteome Discoverer software (Thermo Fisher Scientific, version 1.4.0.288). Charge state deconvolution and deisotoping were not performed. All MS/MS samples were analyzed using Mascot (Matrix Science, London, UK; version 2.3.2). The database was the Human UniProtKB/Swiss-Prot database (Release 2015-03-11, with 20199 sequences). Raw files generated by the Orbitrap Fusion were searched directly using a 10 ppm precursor mass tolerance and a 50 mmu fragment mass tolerance. The enzyme specificity with trypsin was used. Up to two missed cleavages were allowed and peptides with at least 7 amino acids were retained. Carbamidomethyl on cysteine was set as a fixed modification. Oxidation on methionine and Deamidation on asparagine were set as variable modifications. Use the percolator algorithm to control peptide level false discovery rates (FDR) lower than 1%. The Asn modification that did not occur in the N-X-S/T (X≠P) sequon was eliminated to ensure the false positive rate below 1% for the identified glycosylation sites.

**Fig. S1** TEM images of as-prepared  $\text{Fe}_3\text{O}_4@\text{Mg-MOF-74}$  composites with the different concentration of the MOF precursor: (a)  $\text{Mg}(\text{NO}_3)_2 \cdot 6\text{H}_2\text{O}$  (7.3 mM), Ligand (4.4 mM); (b)  $\text{Mg}(\text{NO}_3)_2 \cdot 6\text{H}_2\text{O}$  (9 mM), Ligand (8 mM); (c)  $\text{Mg}(\text{NO}_3)_2 \cdot 6\text{H}_2\text{O}$  (18 mM), Ligand (16 mM); (d)  $\text{Mg}(\text{NO}_3)_2 \cdot 6\text{H}_2\text{O}$  (36 mM), Ligand (32 mM).

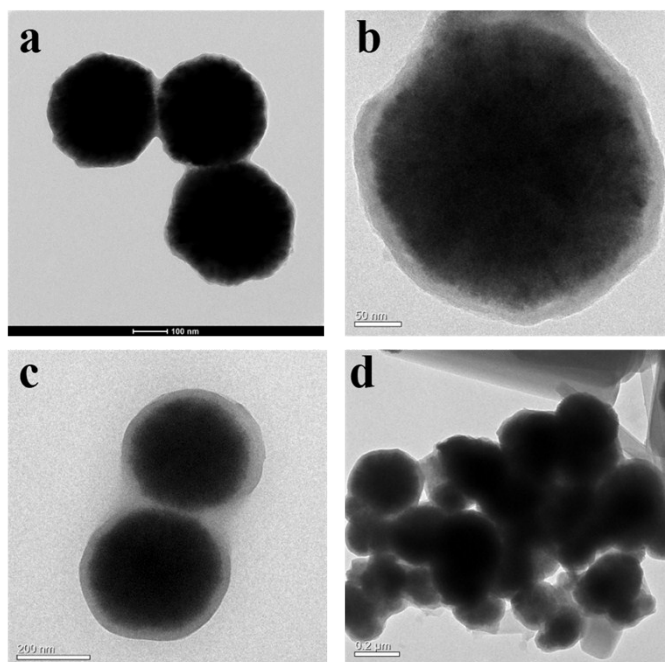

**Fig. S2** The energy dispersive X-ray spectrometer (EDX) of Fe<sub>3</sub>O<sub>4</sub>@Mg-MOF-74 composites.

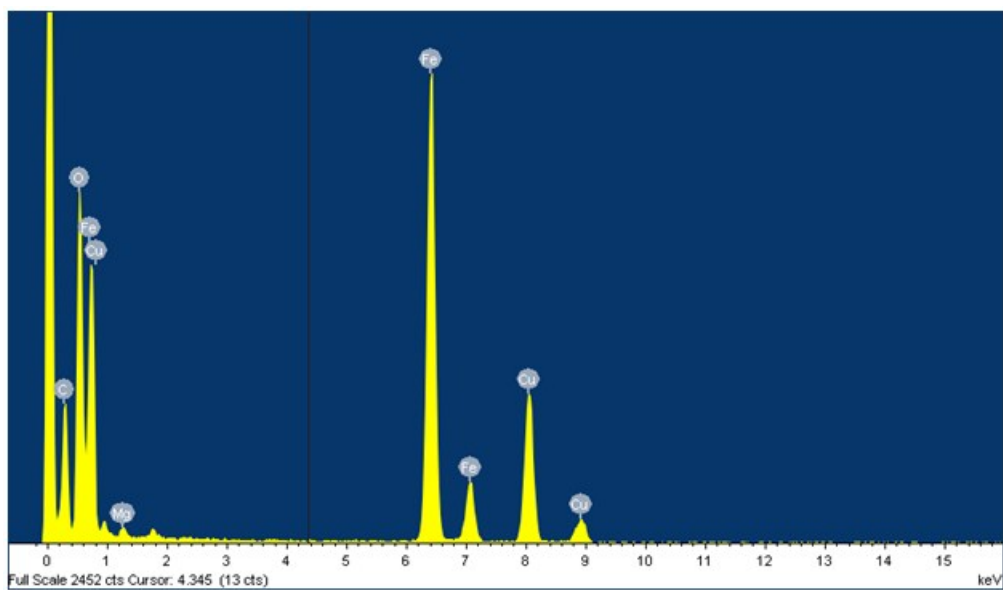

**Fig. S3** FT-IR spectra of  $\text{Fe}_3\text{O}_4$  (the band at  $1611\text{ cm}^{-1}$  assigned to  $\nu_{\text{COO}^-}$ ),  $\text{Fe}_3\text{O}_4@\text{Mg-MOF-74}$  and  $\text{Mg-MOF-74}$ .

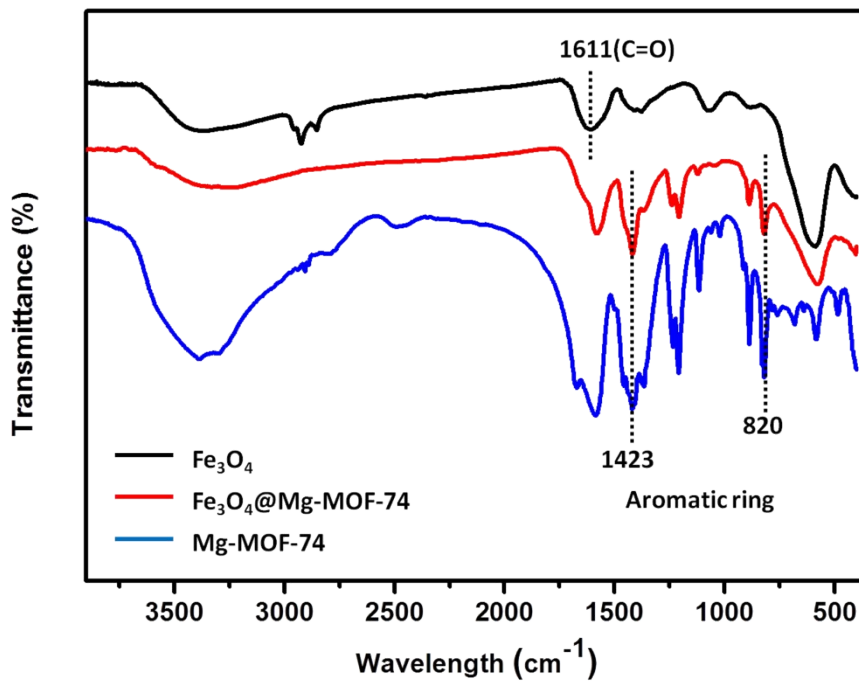



**Fig. S4** The PXRD pattern of  $\text{Fe}_3\text{O}_4$  and  $\text{Fe}_3\text{O}_4@\text{Mg-MOF-74}$ .

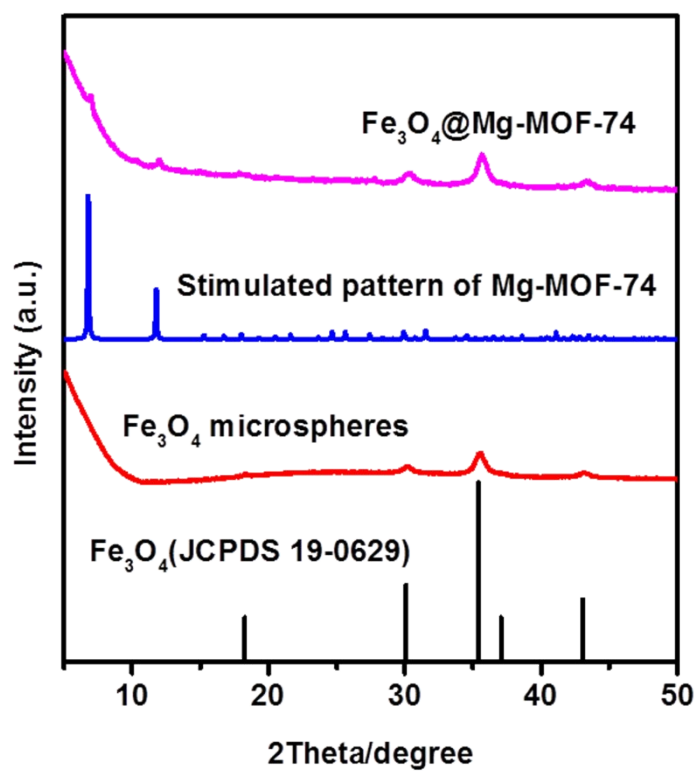

**Fig. S5** (a)  $N_2$  adsorption-desorption isotherms of  $Fe_3O_4@Mg-MOF-74$  at 77 K. Pore size distributions calculated by H-K for the analysis of micropore (b) and BJH for the mesopore (c), respectively.

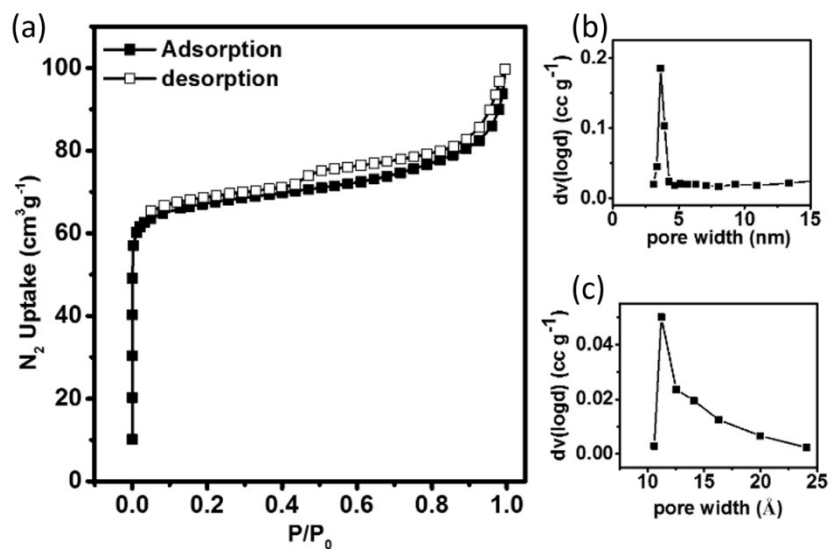

**Fig. S6** The TEM and PXRD images of  $\text{Fe}_3\text{O}_4@\text{Zn-MOF-74}$  (a, c) and  $\text{Fe}_3\text{O}_4@\text{Mg-MOF-74-II}$  particles (b, d).

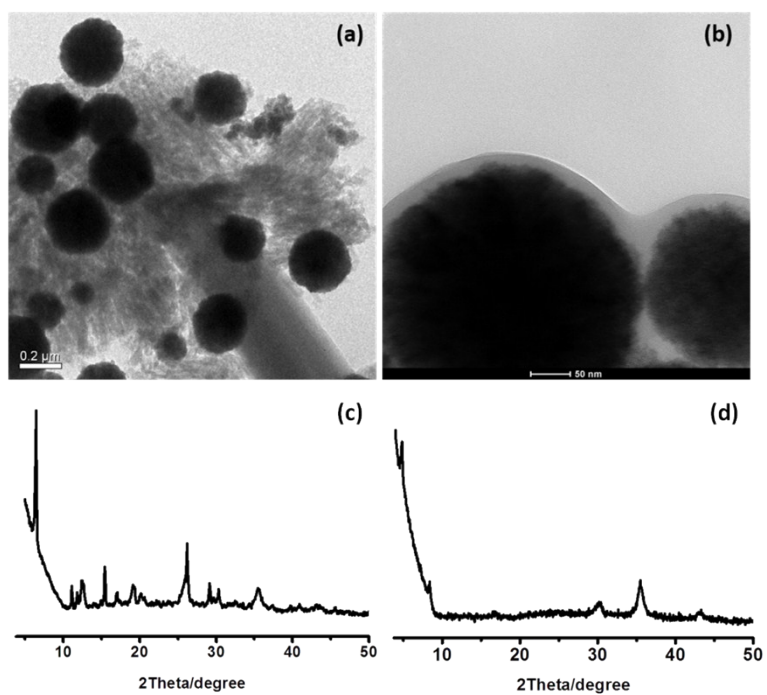

**Fig. S7** MALDI-TOF-MS analysis of glycopeptides derived from HRP enriched by  $\text{Fe}_3\text{O}_4@\text{Mg-MOF-74}$  composites with different buffer solution (a) 85% ACN 1% TFA; (b) 95% ACN 1% TFA; (c) 85% ACN 0.1% TFA and (d) 95% ACN 0.1% TFA.

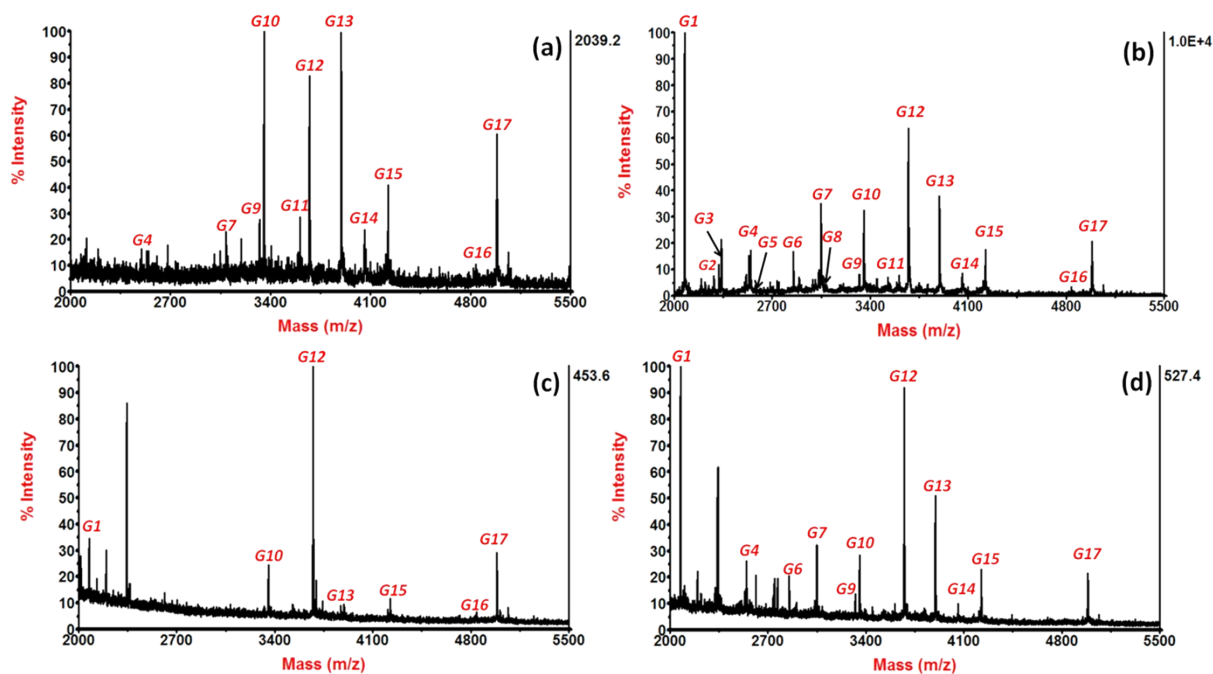

**Fig. S8** The effect of different enrichment time (a) and amount of materials (b) on glycopeptides enriched from HRP tryptic digest at 37 °C.

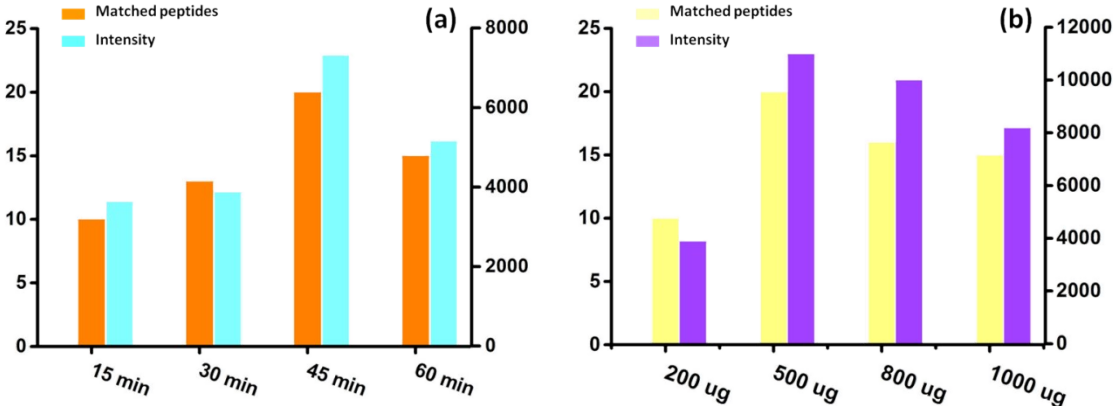

**Fig. S9** MALDI-TOF-MS of tryptic digested HRP ( $10^{-6}$  M): after enrichment by (a)  $\text{Fe}_3\text{O}_4$ , (b)  $\text{Fe}_3\text{O}_4@$ ligand, (c)  $\text{Fe}_3\text{O}_4@$ Mg/ligand and (d)  $\text{Fe}_3\text{O}_4@$ Mg-MOF-74-II.

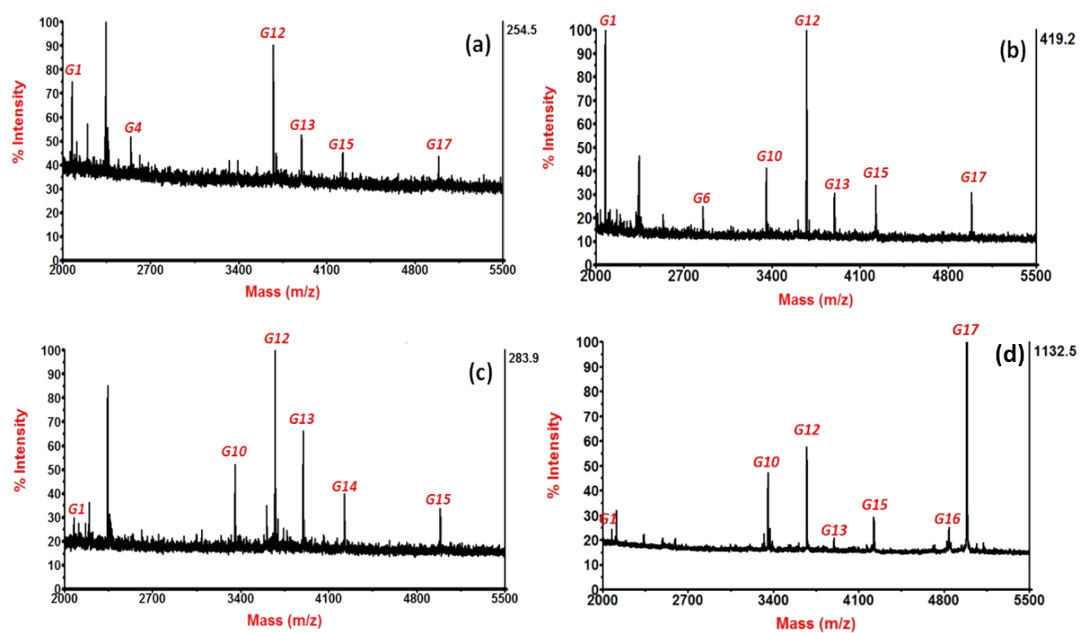

**Fig. S10** MALDI-TOF-MS for glycopeptides enriched by Fe<sub>3</sub>O<sub>4</sub>@Mg-MOF-74 from HRP digests with different concentrations: (a) 100 fmol/μL, (b) 10 fmol/μL, (c) 1 fmol/μL and (d) 0.5 fmol/μL.

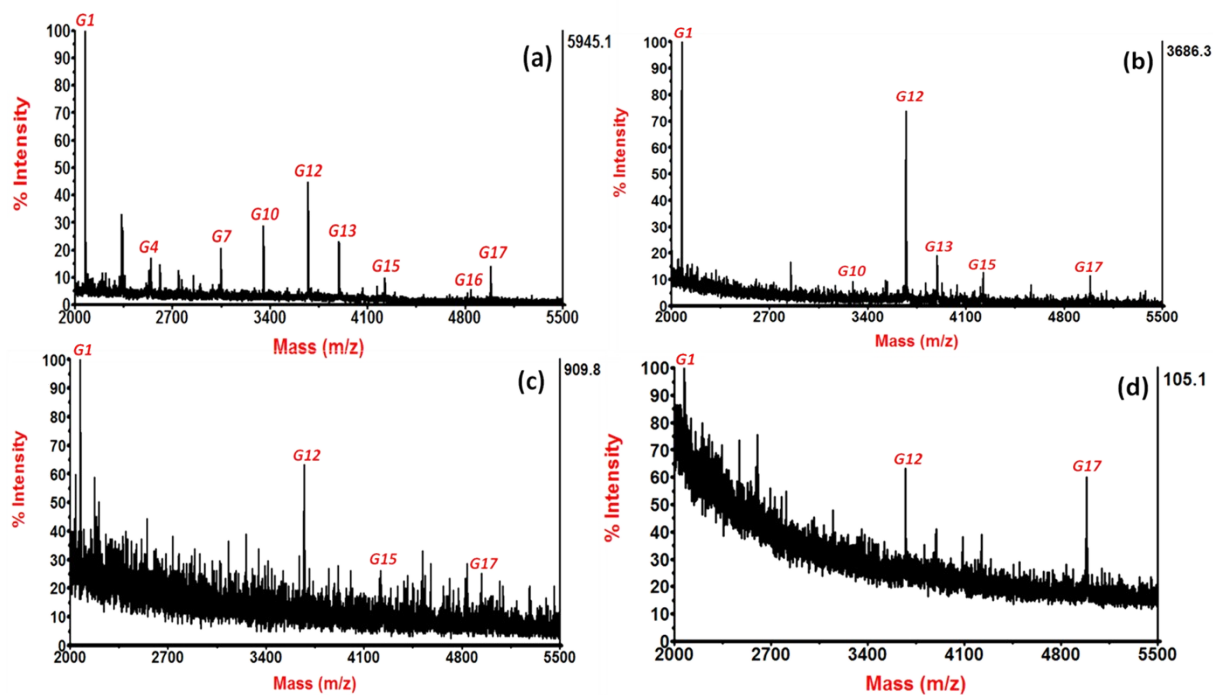

**Fig. S11** The cycling performance of the  $\text{Fe}_3\text{O}_4@\text{Mg-MOF-74}$ : (a) the first time, (b) the second time, (c) the third time, (d) the fourth time, (e) the fifth time and (f) after enrichment with the  $\text{Fe}_3\text{O}_4@\text{Mg-MOF-74}$  placed for three months.

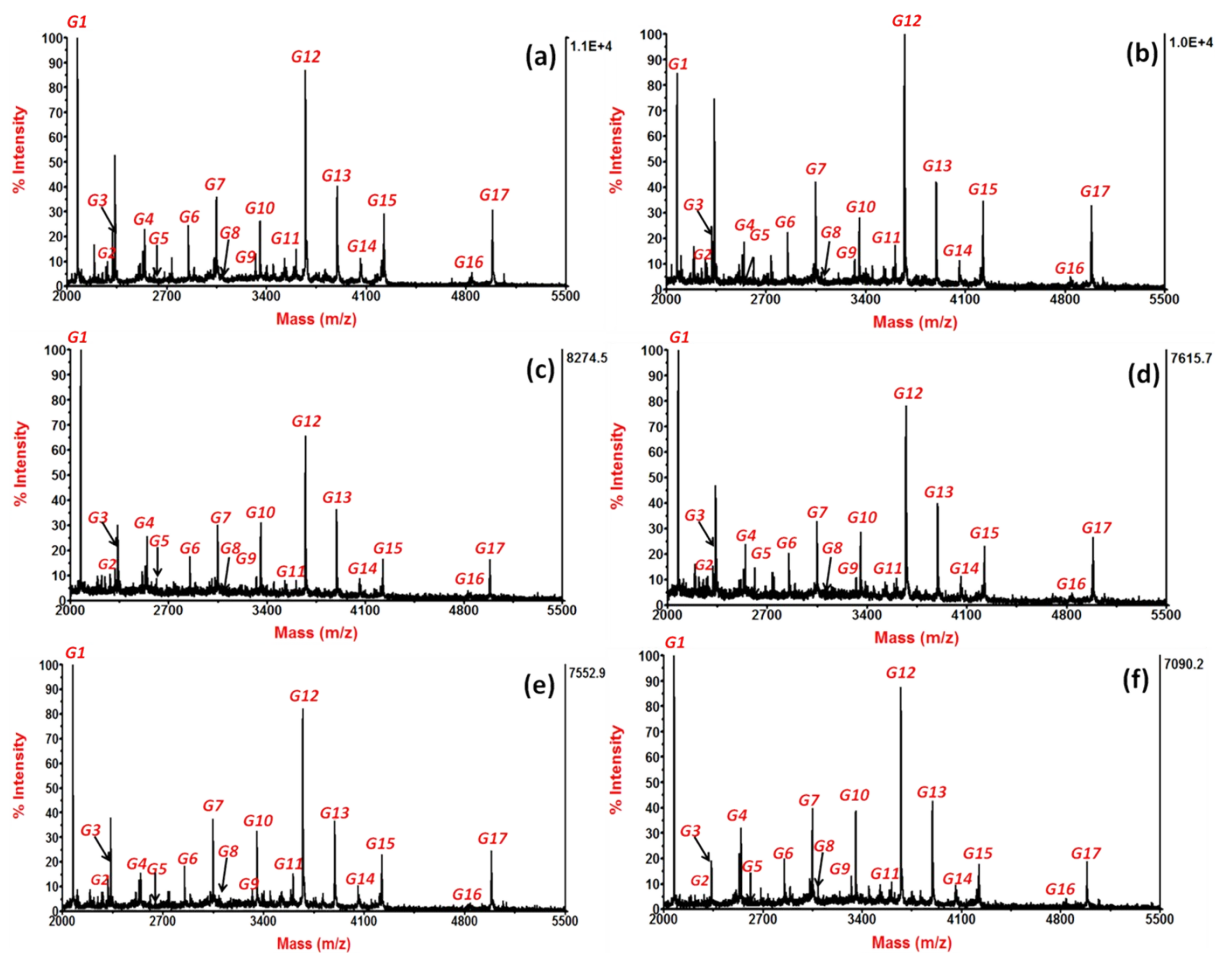



**Table S1.** Detailed information of the observed glycopeptides in HRP tryptic digest. **N#** denotes the N-linked glycosylation site.

| No. | Observed<br>m/z | Glycan composition                      | Amino acid sequence                  |
|-----|-----------------|-----------------------------------------|--------------------------------------|
| 1   | 2074            | XylMan3GlcNAc2                          | PN#VSNIVRRR                          |
| 2   | 2290            | XylMan2GlcNAc2                          | SILLDN#TTSFR                         |
| 3   | 2321            | Man2GlcNAc2                             | MGN#ITPLTGTQGQIR                     |
| 4   | 2543            | XylMan3FucGlcNAc2                       | SSPN#ATDTIPLVR                       |
| 5   | 2612            | XylMan3GlcNAc2                          | MGN#ITPLTGTQGQIR                     |
| 6   | 2850            | FucGlcNAc                               | GLIQSDQELFSSPN#ATDTIPLVR             |
| 7   | 3048            | XylMan2GlcNAc2                          | SFAN#STQTFNFVAFVEAMDR                |
| 8   | 3087            | XylMan3FucGlcNAc2                       | GLCPLNGN#LSALVDFDLR                  |
| 9   | 3323            | XylMan3FucGlcNAc2                       | QLTPTFYDNSCP#VSNIVR                  |
| 10  | 3354            | XylMan3FucGlcNAc2                       | SFAN#STQTFNFVAFVEAMDR                |
| 11  | 3606            | XylMan3FucGlcNAc2                       | NQCRGLCPLNGN#LSALVDFDLR              |
| 12  | 3672            | XylMan3FucGlcNAc2                       | GLIQSDQELFSSPN#ATDTIPLVR             |
| 13  | 3894            | XylMan3FucGlcNAc2                       | LHFHDCFVNGCDASILLDN#TTSFR            |
| 14  | 4057            | XylMan3GlcNAc2                          | QLTPTFYDNESC(AAVESACPR)PN#VSNIVR-H2O |
| 15  | 4222            | XylMan3FucGlcNAc2                       | QLTPTFYDNESC(AAVESACPR)PN#VSNIVR     |
| 16  | 4839            | XylMan3FucGlcNAc2,<br>XylMan3GlcNAc2    | LYN#FSNTGLPDPTLN#TTYLQTLR            |
| 17  | 4984            | XylMan3FucGlcNAc2,<br>XylMan3FucGlcNAc2 | LYN#FSNTGLPDPTLN#TTYLQTLR            |

**Table S2.** Identified N-glycopeptides containing deamidated Asn within N-X-S/T (X≠P) from 1μL human serum digest. **N#** denotes the N-linked lycosylation site.

| No. | Peptide Sequence                                        | Protein Group Accessions |
|-----|---------------------------------------------------------|--------------------------|
| 1   | AALAAFNAqn <b>N#</b> GSNFQLEEISR                        | P02765                   |
| 2   | LEPVHLQLqcMSqEqLAqVAAN <b>#</b> ATK                     | Q96PD5                   |
| 3   | LEPVHLQLqcMSQEQLAQVAAN <b>#</b> ATK                     | Q96PD5                   |
| 4   | LDAPTNLqFVN <b>#</b> ETDSTVLVR                          | P02751                   |
| 5   | ADGTVNqIEGEATPVN <b>#</b> LTEPAK                        | P05090                   |
| 6   | ADGTVNqIEGEATPVN <b>#</b> LTEPAKLEVK                    | P05090                   |
| 7   | LSVDKdqYVEPEN <b>#</b> VTIqcDSGYGVVGPQSITcSGnR          | P04003                   |
| 8   | LSVDKdqYVEPEN <b>#</b> VTIqcDSGYGVVGPQSITcSGnR          | P04003                   |
| 9   | LDPVSLqTLQTN <b>#</b> TSYPK                             | Q99784                   |
| 10  | GLTFQq <b>N#</b> ASSmcVPDQDTAIR                         | P01871                   |
| 11  | ALPQPq <b>N#</b> VTSLLGcTH                              | P02790                   |
| 12  | GLTFQq <b>N#</b> ASSMcVPDQDTAIR                         | P01871                   |
| 13  | GGETAqSADPQWEQLNn <b>K#</b> LsMPLLPADFHK                | P05546                   |
| 14  | GGETAqSADPQWEQLnn <b>K#</b> LsMPLLPADFHK                | P05546                   |
| 15  | SVQEIqATFFYFTP <b>N#</b> KTEDTIFLR                      | P02763                   |
| 16  | SVQEIqATFFYFTP <b>N#</b> KTEDTIFLR                      | P19652                   |
| 17  | YEEQqLEIQ <b>N#</b> SSR                                 | Q8IZF2                   |
| 18  | SVqEIqATFFYFTP <b>N#</b> KTEDTIFLR                      | P02763                   |
| 19  | SVqEIqATFFYFTP <b>N#</b> KTEDTIFLR                      | P19652                   |
| 20  | QQqHLFGSN <b>#</b> VTDCSGnFcLFR                         | P02787                   |
| 21  | VTqVYAEN <b>#</b> GTVLQGSTVASVYK                        | P27169                   |
| 22  | EEqFN <b>#</b> STFR                                     | P01859                   |
| 23  | QNqcfY <b>N#</b> SSYLNVR                                | P19652                   |
| 24  | NPPMGGNVVIFDVTITNqEEPYQ <b>N#</b> HSGR                  | P02745                   |
| 25  | VLTLNLDQVDFqHAG <b>N#</b> YScVASNVQGK                   | P07333                   |
| 26  | qVHFFV <b>N#</b> ASDVDNVK                               | Q96IY4                   |
| 27  | mALSWVLTVLSLLPLLEAqIPLcAnLVPVPIT <b>N#</b> ATLDqITGK    | P02763                   |
| 28  | GNEANYYS <b>N#</b> ATTDEHGLVqFSIN <b>#</b> TTNVMGTSLTVR | P01023                   |
| 29  | VGQLQLSH <b>N#</b> LsLVILVPqNLK                         | P05155                   |
| 30  | ANLtnfPEN <b>#</b> GTfVvnIAQLSQDDSGR                    | P01833                   |
| 31  | LAGKPTHV <b>N#</b> VSVVmAEVDGTcY                        | P01876                   |
| 32  | STGKPTLY <b>N#</b> VSLVMSDTAGTcY                        | P01871                   |
| 33  | LAGKPTHV <b>N#</b> VSVVMAEVDGTcY                        | P01876                   |
| 34  | QQqHLFGSN <b>#</b> VTDCSGnFcLFR                         | P02787                   |
| 35  | QQqHLFGSN <b>#</b> VTDCSGnFcLFR                         | P02787                   |
| 36  | ERSWPAVGN <b>#</b> cSSALR                               | P02790                   |
| 37  | ITYSIVQT <b>N#</b> cSK                                  | P01042                   |
| 38  | FEVDSPVY <b>N#</b> ATWSASLK                             | P04114                   |
| 39  | ELHHLQE <b>N#</b> VSN AFLDK                             | P00450                   |
| 40  | GFGVAIVG <b>N#</b> YTAALPTEAALR                         | Q96PD5                   |
| 41  | LGSFEGLV <b>N#</b> LTFIHLQHNR                           | P51884                   |
| 42  | KLPPGLL <b>N#</b> FTLLR                                 | P02750                   |
| 43  | TKPREEQ <b>N#</b> STFR                                  | P01859                   |
| 44  | LSLLEPG <b>N#</b> GTFTVILNQLTSR                         | P01833                   |
| 45  | VGQLQLSH <b>N#</b> LsLVILVPQNLK                         | P05155                   |
| 46  | LNPTVTYG <b>N#</b> DSFSAK                               | P05362                   |
| 47  | NAHGEEK <b>N#</b> LTAR                                  | Q06033                   |
| 48  | HGIQYFN <b>N#</b> NTqHSSLFMLNEVK                        | P01042                   |
| 49  | VYKPSAG <b>N#</b> nSLYR                                 | P02749                   |

|     |                                    |        |
|-----|------------------------------------|--------|
| 50  | TVLTPATnHMGN#VTFTIPAnR             | P01024 |
| 51  | HIPGLIHn#mTAR                      | Q16610 |
| 52  | TVLTPATnHmGN#VTFTIPANR             | P01024 |
| 53  | VLYLAAAYn#cTLRPVSK                 | Q9UGM5 |
| 54  | YPHKPEIn#STTHPGADLQENFcR           | P00734 |
| 55  | FSDGLESn#SSTQFEVKK                 | P0C0L5 |
| 56  | FSDGLESn#SSTQFEVK                  | P0C0L5 |
| 57  | FSDGLESn#SSTQFEVKK                 | P0C0L4 |
| 58  | FSDGLESn#SSTQFEVK                  | P0C0L4 |
| 59  | VYKPSAGn#NSLYR                     | P02749 |
| 60  | KLHINHn#LTVSGLPK                   | P51884 |
| 61  | VTQVYAEn#GTVLQGSTVASVYK            | P27169 |
| 62  | LPPGLLAn#FTLLR                     | P02750 |
| 63  | KQVHFFVn#ASDVDNVK                  | Q96IY4 |
| 64  | FVGTPEVn#QTTLYQR                   | P01033 |
| 65  | LLDLSGn#LTHLPK                     | P40197 |
| 66  | VSTVYANn#GSVLQGTSVASVYHGK          | Q15166 |
| 67  | AALAAFnAqNn#GSNFqLEEISR            | P02765 |
| 68  | LYLGSNn#LTALHPALFQn#LSK            | P22792 |
| 69  | SLPNFPn#TSATAN#ATGGR               | Q6UXB8 |
| 70  | AALAAFnAQnN#GSNFQLEEISR            | P02765 |
| 71  | DIVEYYn#DSN#GSHVLqGR               | P25311 |
| 72  | DIVEYYn#DSN#GSHVLQGR               | P25311 |
| 73  | GLTFQn#ASSmcVPDQDTAIR              | P01871 |
| 74  | QVFPGLnYcTSGAYSn#ASSTDSASYPLTGDTR  | P04114 |
| 75  | LYLGSNn#LTALHPALFQn#LSK            | P22792 |
| 76  | SWPAVGn#cSSALR                     | P02790 |
| 77  | SEGSSVn#LSPPLEQcVPDR               | P00734 |
| 78  | ALPQPQn#VTSLLGcTH                  | P02790 |
| 79  | GLTFQn#ASSMcVPDQDTAIR              | P01871 |
| 80  | LSDLSIn#STEcLHVHcR                 | P05156 |
| 81  | LQNNENn#IScVER                     | Q03591 |
| 82  | FVEGSHn#STVSLTTK                   | P04114 |
| 83  | KKEDALn#ETR                        | P10909 |
| 84  | LHINHn#LTVSGLPK                    | P51884 |
| 85  | DLDMFIN#ASK                        | O75882 |
| 86  | DFYVDEN#TTVR                       | P29622 |
| 87  | YAEDKFn#ETTEK                      | P43652 |
| 88  | AFGSNPn#LTK                        | P22792 |
| 89  | IYSGILn#LSDITK                     | P03952 |
| 90  | QESMNSn#VSVYQPPR                   | P13598 |
| 91  | QVHFFVn#ASDVDNVK                   | Q96IY4 |
| 92  | EGHFYYn#ISEVK                      | P55058 |
| 93  | EHEAQS#ASLDVFLGHTNVEELMK           | P00736 |
| 94  | VYSGILn#QSEIK                      | P03951 |
| 95  | EVFVHPn#YSK                        | P04070 |
| 96  | VVLHPn#YSqVDIGLIK                  | P00738 |
| 97  | SLGNVn#FTVSAEALESqELcGTEVPSVPEHGRK | P01023 |
| 98  | LSALDnLLn#HSSMFLK                  | Q9Y4L1 |
| 99  | LYLGSn#LTALHPALFQn#LSK             | P22792 |
| 100 | LHINHn#LTVSGLPK                    | P51884 |
| 101 | AVLQLnEEGVDTAGSTGVTLn#LTSKPIILR    | P08185 |
| 102 | MVSHHn#LTTGATLInEqWLLTTAK          | P00739 |
| 103 | MVSHHn#LTTGATLInEqWLLTTAK          | P00738 |
| 104 | MVSHHn#LTTGATLInEqWLLTTAK          | P00739 |
| 105 | MVSHHn#LTTGATLInEqWLLTTAK          | P00738 |

---

|     |                                     |        |
|-----|-------------------------------------|--------|
| 106 | VASVInINPN#TTHSTGScR                | P13473 |
| 107 | IIVPLnNREN#ISDPTSPLR                | P01591 |
| 108 | GAFISN#FSmTVDGK                     | P19823 |
| 109 | MDGASN#VTcInSR                      | P08603 |
| 110 | MDGASN#VTcINSR                      | P08603 |
| 111 | SLGNVN#FTVSAEAELESQELcGTEVPSVPEHGRK | P01023 |
| 112 | LQAPLN#YTEFQKPIcLPSK                | P03952 |
| 113 | LETTVN#YTDSQRPIcLPSK                | P03951 |
| 114 | KFVQGN#STEVAcHPGYGLPK               | Q02985 |
| 115 | MVSHHN#LTTGATLINEQWLLTTAK           | P00739 |
| 116 | VVLHPN#YSQVDIGLIK                   | P00738 |
| 117 | VVLHPN#YSQVDIGLIK                   | P00738 |
| 118 | MVSHHN#LTTGATLINEQWLLTTAK           | P00738 |
| 119 | MVSHHN#LTTGATLINEQWLLTTAK           | P00739 |
| 120 | MVSHHN#LTTGATLINEQWLLTTAK           | P00738 |
| 121 | SPDVIN#GSPISQK                      | P08603 |
| 122 | KYNSQN#QSNNQFVLYR                   | P01042 |
| 123 | LNAEN#ATFYFK                        | P01042 |
| 124 | GAFISN#FSMTVDGK                     | P19823 |
| 125 | TPLTAN#ITK                          | P01877 |
| 126 | ALGFEN#ATQALGR                      | Q08380 |
| 127 | IDSTGN#VTNELR                       | O75882 |
| 128 | DIENFN#STQK                         | P43652 |
| 129 | IVGGTN#SSWGEWPWQVSLQVK              | P03952 |
| 130 | WSDIWN#ATK                          | P06276 |
| 131 | LVPHM#VSAVEK                        | Q96KN2 |
| 132 | SLEAIN#GSGLQMGLQR                   | P09172 |
| 133 | LPYQGN#ATMLVVLMEK                   | Q9UK55 |
| 134 | LHEITN#ETFR                         | Q6EMK4 |
| 135 | LPTQN#ITFqTESSVAEqEAEFQSPK          | Q14624 |
| 136 | LPTQN#ITFqTESSVAEQEAEFQSPK          | Q14624 |
| 137 | YNSQN#qSNNQFVLYR                    | P01042 |
| 138 | YGNPN#ETQNN#STSWPVFK                | P06276 |
| 139 | NLFLN#HSEN#ATAK                     | P00739 |
| 140 | NLFLN#HSEN#ATAK                     | P00738 |
| 141 | LNAEN#ATFYFK                        | P01042 |
| 142 | SEGTN#STLTLSPVSFEnEHSYLcTVTcGHK     | P19320 |
| 143 | EGYSN#ISYIVVnHqGISSR                | P49908 |
| 144 | EGYSN#ISYIVVnHQGISSR                | P49908 |
| 145 | YGNPN#ETQNN#STSWPVFK                | P06276 |
| 146 | ISEEN#ETTcYmGK                      | P08603 |
| 147 | ISEEN#ETTcYMgK                      | P08603 |
| 148 | VIDFN#cTTSSVSSALAnTK                | P04196 |
| 149 | VIDFN#cTTSSVSSALANTK                | P04196 |
| 150 | AELSN#HTRPVILVPGcLGNqLEAK           | P04180 |
| 151 | AELSN#HTRPVILVPGcLGNQLEAK           | P04180 |
| 152 | EPGSN#VTMSVDAEcVPMVR                | Q08380 |
| 153 | YLPVN#SLLTSDcSER                    | Q9Y6R7 |

---

---

|     |                                    |        |
|-----|------------------------------------|--------|
| 154 | FVQGN#STEVAcHPGYGLPK               | Q02985 |
| 156 | NLFLN#HSENATAK                     | P00739 |
| 157 | NLFLN#HSENATAK                     | P00738 |
| 158 | EDALN#ETR                          | P10909 |
| 159 | YNSQN#QSNNQFVLYR                   | P01042 |
| 160 | EEQYN#STYR                         | P01857 |
| 161 | SLTFN#ETYQDISELVYGAK               | P01008 |
| 162 | AFITN#FSMIIDGMTYPGIK               | Q14624 |
| 163 | EEQFN#STYR                         | P01861 |
| 164 | EEQYN#STFR                         | P01860 |
| 165 | TMFPN#LTDVR                        | P06681 |
| 166 | MFSQN#DTR                          | P02750 |
| 167 | EGYSN#ISYIVVNHQGISSR               | P49908 |
| 168 | EEQFN#STFR                         | P01859 |
| 169 | GVNFN#VSK                          | P03952 |
| 170 | DTFVN#ASR                          | P05155 |
| 171 | VQPFN#VTQ GK                       | P13473 |
| 172 | QGGVN#ATQVLIQHLR                   | Q13790 |
| 173 | ETFFN#LSKR                         | Q9UK55 |
| 174 | ETFFN#LSK                          | Q9UK55 |
| 175 | FQLLN#FSSSELK                      | Q9BY67 |
| 176 | YTGn#ASALFILPDqDKMEEVEAmLLPETLKR   | P01011 |
| 177 | SLGnVN#FTVSAEALESqELcGTEVPSVPEHGR  | P01023 |
| 178 | SLGnVN#FTVSAEALESqELcGTEVPSVPEHGRK | P01023 |
| 179 | SLGnVN#FTVSAEALESQELcGTEVPSVPEHGR  | P01023 |
| 180 | VNqnLVYESGSLN#FSK                  | P04114 |
| 181 | THTN#ISESHPN#ATFSAVGEASlCDDWnSGER  | P01871 |
| 182 | YDFN#SSmLYSTAK                     | P04114 |
| 183 | YTGn#ASALFILPDQDKmEEVEAMLLPETLK    | P01011 |
| 184 | EWDN#TTTEcR                        | P20851 |
| 185 | FLNN#GTcTAEGK                      | P05156 |
| 186 | GTAN#TTTAGVPcQR                    | P26927 |
| 187 | YTGn#ASALFILPDQDK                  | P01011 |
| 188 | YLGn#ATAIFFLPDEGK                  | P01009 |
| 189 | GHVN#ITR                           | P00734 |
| 190 | WVSN#KTEGR                         | P01008 |
| 191 | AFEN#VTDLQWLILDHNLENSK             | P51884 |
| 192 | VPGN#VTAVLGETLK                    | P01833 |
| 193 | VLSN#NSDANLELINTWVAK               | P05155 |
| 194 | DFVN#ASSKYEITTIHNLFR               | P05546 |
| 195 | DFVN#ASSK                          | P05546 |
| 196 | VTQN#LTLIEESLTSEFIHDIDR            | P36955 |
| 197 | IYSN#HSALESLALIPLQAPLK             | P55058 |
| 198 | TLN#qSSDELQLSmGNAMFVK              | P01011 |
| 199 | TLN#qSSDELQLSMGNAMFVK              | P01011 |
| 200 | LQN#LTLPTN#ASIK                    | Q13201 |
| 201 | LQnNEN#IScVER                      | Q03591 |

---

---

|     |                                  |        |
|-----|----------------------------------|--------|
| 202 | FLnN#GTcTAEgK                    | P05156 |
| 203 | YK N#nSDISSTR                    | P01871 |
| 204 | GLN#VTLsSTGRnGfK                 | P0C0L5 |
| 205 | GLN#VTLsSTGRnGfK                 | P0C0L4 |
| 206 | MLN#TSSLLEQLnEQFNWVSR            | P10909 |
| 207 | LGN#WSAmPScK                     | P02749 |
| 208 | FLN#DTmAVYEAk                    | P29622 |
| 209 | TLN#QSSDELQLSMGNAmFVK            | P01011 |
| 210 | VSN#VScQASVSR                    | P55058 |
| 211 | WVN#YScLDQAR                     | Q76LX8 |
| 212 | ISN#SSDTVEcEcSENWK               | O75882 |
| 213 | LGN#WSAMPScK                     | P02749 |
| 214 | GLN#VTLsSTGR                     | P0C0L5 |
| 215 | GLN#VTLsSTGR                     | P0C0L4 |
| 216 | YK N#NSDISSTR                    | P01871 |
| 217 | MLN#TSSLLEQLNEQFNWVSR            | P10909 |
| 218 | LAN#LTQGEDQYYLR                  | P10909 |
| 219 | GLN#LTEDTYKPR                    | Q08380 |
| 220 | HAN#WTLTPLK                      | P27169 |
| 221 | FLN#DTMAVYEAk                    | P29622 |
| 222 | AVN#ITSENLIDDVVSILR              | P02748 |
| 223 | VVN#STTGPGEHLR                   | P07996 |
| 224 | VLN#FTTK                         | P13671 |
| 225 | VQN#MSQSIEVLDR                   | Q99784 |
| 226 | TWN#QSIAlR                       | P12259 |
| 227 | AFN#STLPTMAQMEK                  | P16070 |
| 228 | LFN#VTPQDEQK                     | O75144 |
| 229 | KIVLDPSGSMNIYLVLdGSDSIGASn#FTGAK | P00751 |
| 230 | IVLDPSGSMNIYLVLdGSDSIGASn#FTGAK  | P00751 |
| 231 | RNPPMGgNVVIFDTVITNQEePYQn#HSGR   | P02745 |
| 232 | NPPMGgNVVIFDTVITNQEePYQn#HSGR    | P02745 |
| 233 | AVLQLNEEGVDtAGSTGVTLn#LTSKPIILR  | P08185 |
| 234 | FN#SSYLQGTnQITGR                 | P04114 |
| 235 | HN#STGcLR                        | P10909 |
| 236 | WN#NTGcQALPSQDEGpSK              | P01833 |
| 237 | RN#HScEPcQTLAVR                  | P00748 |
| 238 | FN#LTETSEAEIHQSFQHLLR            | P01011 |
| 239 | EN#GTISR                         | P02763 |
| 240 | FN#SSYLQGTnQITGR                 | P04114 |
| 241 | EN#LTAPGSDSAVFFEQGTTR            | P00450 |
| 242 | EN#GTVSR                         | P19652 |
| 243 | DN#YTKAEeILSR                    | P06276 |
| 244 | YN#FSFR                          | P01031 |
| 245 | GN#ETLHYETFGK                    | P13598 |
| 246 | DN#YTDLVAIQNK                    | P14151 |
| 247 | EN#ISDPTSPLR                     | P01591 |
| 248 | KN#QSVNVFLGHTAIDeMLK             | Q9NZP8 |

---

---

|     |                                                               |        |
|-----|---------------------------------------------------------------|--------|
| 249 | DTTVLVSPSSILEEGSSV <b>N</b> #MTcLSqGFPAPK                     | P19320 |
| 250 | LVLSEKTVLTPATNHMG <b>N</b> #VTFTIPANR                         | P01024 |
| 251 | LSLHRPALEDLLL <b>GSEAN</b> #LTcTLTGLR                         | P01876 |
| 252 | LSLHRPALEDLLL <b>GSEAN</b> #LTcTLTGLR                         | P01877 |
| 253 | MPSQAPTGNFYQP <b>LLN</b> #SSMcLEDSR                           | O75882 |
| 254 | IQSPLFTLDANADIG <b>N</b> #GTTTSANEAGIAASITAK                  | P04114 |
| 255 | ADGTVNQIEGEATPV <b>N</b> #LTEPAK                              | P05090 |
| 256 | ADGTVNQIEGEATPV <b>N</b> #LTEPAKLEVK                          | P05090 |
| 257 | DVQIIVFPEDGIHG <b>FN</b> #FTR                                 | P43251 |
| 258 | MAWPEDHVFISTPS <b>FN</b> #YTGR                                | P04180 |
| 259 | LVLSEKTVLTPAT <b>n</b> HMG <b>N</b> #VTFTIPANREFK             | P01024 |
| 260 | VTVQSLT <b>VETLEHN</b> #QTYEcR                                | P07333 |
| 261 | SVQEIQATFFYFT <b>PN</b> #KTEDTIFLR                            | P02763 |
| 262 | SVQEIQATFFYFT <b>PN</b> #KTEDTIFLR                            | P19652 |
| 263 | SVQEIQATFFYFT <b>PN</b> #KTEDTIFLR                            | P02763 |
| 264 | SVQEIQATFFYFT <b>PN</b> #KTEDTIFLR                            | P19652 |
| 265 | LDAFFALEGFPTE <b>PN</b> #SSSR                                 | P08294 |
| 266 | LSHNELADSGIPG <b>n</b> S <b>FN</b> #VSSLVELDLSYNK             | P51884 |
| 267 | ADTHDEILEGL <b>FN</b> #LTEIPEAQIHEGFQELLR                     | P01009 |
| 268 | TLYETE <b>V</b> FSTDF <b>S</b> #ISAAC                         | P05543 |
| 269 | VNQNLVYESG <b>SLN</b> #FSKLEIqSqVDSQHVGHSVLTAK                | P04114 |
| 270 | LSVDKDYVEPE <b>N</b> #VTIQcDSGYGVVGPQSITcSG <b>n</b> R        | P04003 |
| 271 | LSVDKDYVEPE <b>N</b> #VTIQcDSGYGVVGPQSITcSG <b>n</b> R        | P04003 |
| 272 | LQAILGVPWKD <b>KN</b> #cTSR                                   | P01019 |
| 273 | VNQNLVYESG <b>SLN</b> #FSK                                    | P04114 |
| 274 | IYPGVDFGGEEL <b>N</b> #VTFVK                                  | P03952 |
| 275 | LGTSLS <b>SGH</b> VLM <b>N</b> #GTLK                          | P80108 |
| 276 | AAPAPQEATAT <b>FN</b> #STADR                                  | P13598 |
| 277 | AAPAPQEATAT <b>FN</b> #STADREDGHR                             | P13598 |
| 278 | LDPVSLQTLQ <b>TWN</b> #TSYPK                                  | Q99784 |
| 279 | GPSTPLPEDPN <b>WN</b> #VTEFH <b>TPK</b>                       | P15144 |
| 280 | TVLTPATNHMG <b>N</b> #VTFTIP <b>An</b> R                      | P01024 |
| 281 | ADTHDEILEGL <b>n</b> <b>FN</b> #LTEIPEAqIHEGFQELLR            | P01009 |
| 282 | LNAAKALPQP <b>QN</b> #VTSL <b>L</b> Gc <b>TH</b>              | P02790 |
| 283 | TVLTPATNHMG <b>N</b> #VTFTIP <b>An</b> R                      | P01024 |
| 284 | FNPGAESV <b>VLSN</b> #STLK                                    | Q13201 |
| 285 | SVVAPATDGGL <b>N</b> #LTST <b>FLR</b>                         | P41222 |
| 286 | AYLLPAPPAG <b>PN</b> #ASESEEDR                                | P17936 |
| 287 | IQSPLFTLD <b>An</b> ADIG <b>N</b> #GTT <b>SAn</b> EAGIAASITAK | P04114 |
| 288 | IQSPLFTLD <b>An</b> ADIG <b>N</b> #GTT <b>SANE</b> AGIAASITAK | P04114 |
| 289 | AALAAFNAQ <b>NN</b> #GSNFQLE <b>ISR</b>                       | P02765 |
| 290 | LDAPT <b>N</b> LQF <b>VN</b> #ETDST <b>V</b> LVR              | P02751 |
| 291 | QSVPAHF <b>VALN</b> #GSK                                      | P06681 |
| 292 | EYESYSD <b>FERN</b> #VTEK                                     | P07358 |
| 293 | EHEGAIY <b>PDN</b> #TTDF <b>qR</b>                            | P00450 |
| 294 | SLDFNTL <b>VDN</b> #ISVDPETGDL <b>WV</b> Gc <b>HP</b> NGMK    | P27169 |
| 295 | VASVININ <b>PN</b> #TTHSTG <b>Sc</b> R                        | P13473 |

---

|     |                                                      |        |
|-----|------------------------------------------------------|--------|
| 296 | EHEGAIYPD <b>N</b> #TTDFQR                           | P00450 |
| 297 | AQLLQGLGF <b>N</b> #LTER                             | P08185 |
| 298 | DIVEYYNDS <b>N</b> #GSHVLQGR                         | P25311 |
| 299 | AAIPSALDT <b>N</b> #SSK                              | Q08380 |
| 300 | TVIRPFYLT <b>N</b> #SSGVD                            | Q08380 |
| 301 | SQILEGLGF <b>N</b> #LTELSESDVHR                      | P29622 |
| 302 | NPVGLIGA <b>E</b> <b>N</b> #ATGETDPSHSK              | P43251 |
| 303 | VVTVAALGT <b>N</b> #ISIHKDEIGK                       | Q9Y6R7 |
| 304 | NPNNQVFP <b>N</b> #GTLAPSIPIWGGSWR                   | Q9Y6R7 |
| 305 | IIVPLNNRE <b>N</b> #ISDPTSPLR                        | P01591 |
| 306 | SMVDFMNTD <b>N</b> #FTSHR                            | Q99784 |
| 307 | nqAL <b>N</b> #LSLAYSFVTPLTSMVVTKPDDQEQSQVAEKPMEGESR | Q14624 |
| 308 | nGTGHG <b>N</b> #STHHGPEYMR                          | P02790 |
| 309 | nLFL <b>N</b> #HSEnATAK                              | P00739 |
| 310 | nLFL <b>N</b> #HSEnATAK                              | P00738 |
| 311 | n <b>N</b> #ATVHEQVGGPSLTSDLQAQSK                    | P04004 |
| 312 | <b>N</b> #LSmPLLPA DFHK                              | P05546 |
| 313 | <b>N</b> #TTcqDLQIEVTVK                              | P0C0L5 |
| 314 | <b>N</b> #TTcqDLQIEVTVK                              | P0C0L4 |
| 315 | <b>N</b> #HScEPcQTLAVR                               | P00748 |
| 316 | <b>N</b> #VScPQLEVPVcPSGFQLScK                       | P04275 |
| 317 | <b>N</b> #TTcQDLQIEVTVK                              | P0C0L5 |
| 318 | <b>N</b> #TTcQDLQIEVTVK                              | P0C0L4 |
| 319 | <b>N</b> #HScSEGQISIFR                               | O75882 |
| 320 | ncGV <b>N</b> #cSGDVFTALIGEIASPhYPKYPENSr            | P09871 |
| 321 | <b>N</b> #LTDFAEQYSIQDWAK                            | P04114 |
| 322 | <b>N</b> #NSDISSTR                                   | P01871 |
| 323 | <b>N</b> #LSMPLLPA DFHK                              | P05546 |
| 324 | <b>N</b> #LTTSLTESVDR                                | P80108 |
| 325 | <b>N</b> #VSVEALASALQLLAR                            | Q13790 |
| 326 | <b>N</b> #VSEDLPLPTFSPTLLGDSR                        | P11597 |
| 327 | <b>N</b> #ATLVNEADKLR                                | P15144 |
| 328 | <b>N</b> #GSGAVFPVAGADVQTLR                          | O00391 |
| 329 | <b>N</b> #LTALPPDLPK                                 | P07359 |
| 330 | RNPPmGGNVVIFDTVITNQEEP <b>YQ</b> <b>N</b> #HSGR      | P02745 |
| 331 | NPPmGGNVVIFDTVITNQEEP <b>YQ</b> <b>N</b> #HSGR       | P02745 |
| 332 | TmFP <b>N</b> #LTDVR                                 | P06681 |
| 333 | TVLTPATNHm <b>G</b> <b>N</b> #VTFTIPANR              | P01024 |
| 334 | mVSHH <b>N</b> #LTTGATLINEqWLLTTAK                   | P00739 |
| 335 | mVSHH <b>N</b> #LTTGATLINEqWLLTTAK                   | P00738 |
| 336 | mDGAS <b>N</b> #VTcINSR                              | P08603 |
| 337 | mVSHH <b>N</b> #LTTGATLINEqWLLTTAK                   | P00739 |
| 338 | mVSHH <b>N</b> #LTTGATLINEqWLLTTAK                   | P00738 |
| 339 | mL <b>N</b> #TSSLLEqLNEQFNWVSR                       | P10909 |
| 340 | mL <b>N</b> #TSSLLEqLNEQFNWVSR                       | P10909 |
| 341 | QVFPGLNYcTSGAYS <b>N</b> #ASSTDSASYYP LTGDTR         | P04114 |
| 342 | VYLQGLIDcYLF <b>G</b> <b>N</b> #SSTVLEDSK            | P35542 |



|     |                                     |        |
|-----|-------------------------------------|--------|
| 343 | LKELPGVcN#ETMMALWEEcKPeLK           | P10909 |
| 344 | TELFSSScPGGIMLN#ETGqGYQR            | O95445 |
| 345 | TELFSSScPGGIMLN#ETGQGYQR            | O95445 |
| 346 | DTAVFEcLPqHAMFGN#DTITcTTHGN#WTK     | P02749 |
| 347 | DTAVFEcLPqHAmFGN#DTITcTTHGN#WTK     | P02749 |
| 348 | DTAVFEcLPQHAmFGN#DTITcTTHGN#WTK     | P02749 |
| 349 | WDPEVNeSmAQIQLcPPPPqIPnSHN#MTTTLNYR | P08603 |
| 350 | WDPEVNeSmAQIQLcPPPPQIPnSHN#MTTTLNYR | P08603 |
| 351 | DTAVFEcLPQHAmFGN#DTITcTTHGN#WTK     | P02749 |
| 352 | WDPEVNeSMAQIQLcPPPPQIPnSHN#MTTTLNYR | P08603 |
| 353 | DAGVVcTN#ETR                        | Q08380 |
| 354 | ELPGVcN#ETMmALWEEcKPeLK             | P10909 |
| 355 | ELPGVcN#ETMMALWEEcKPeLK             | P10909 |
| 356 | KEHETcLAPELYNGN#YSTTQK              | P05160 |
| 357 | KEHETcLAPELYnGN#YSTTQK              | P05160 |
| 358 | LTDTIcGVGN#MSAN#ASDQER              | P06681 |
| 359 | LTDTIcGVGN#mSAN#ASDQER              | P06681 |
| 360 | RGPEcSQN#YTTPSGVIK                  | O14786 |
| 361 | EHETcLAPELYNGN#YSTTQK               | P05160 |
| 362 | EHETcLAPELYnGN#YSTTQK               | P05160 |
| 363 | AATcINPLN#GSVcERPAN#HSAK            | O75882 |
| 364 | QDQcIYN#TTYLnVQR                    | P02763 |
| 365 | QDQcIYN#TTYLNVQR                    | P02763 |
| 366 | QNQcFYn#SSYLNvQR                    | P19652 |
| 367 | LGAcN#DTLqQLMEVFK                   | P01008 |
| 368 | TLFcN#ASKEWDN#TTTEcR                | P20851 |
| 369 | LGAcN#DTLQQLmEVFK                   | P01008 |
| 370 | LGAcN#DTLQQLMEVFK                   | P01008 |
| 371 | TLFcN#ASK                           | P20851 |
| 372 | WEYcN#LTR                           | Q16609 |
| 373 | DKIcDLLVANNHFAHFFAPQN#LTNMNK        | P19827 |
| 374 | LGHcPDPVLVNGEFSSSGPVN#VSDK          | P20851 |
| 375 | LGHcPDPVLVnGEFSSSGPVN#VSDK          | P20851 |
| 376 | VTAcHSSQPN#ATLYK                    | P05543 |
| 377 | KVScPIMPcSN#ATVPDGEccPR             | P07996 |
| 378 | IPcSqPPqIEHGTIN#SSR                 | P08603 |
| 379 | KVcqDcPLLAPLN#DTR                   | P02765 |
| 380 | SScGKEN#TSDPSLVIAFGR                | P11279 |
| 381 | GICN#SSDVR                          | O75882 |
| 382 | IPcSQPPQIEHGTIN#SSR                 | P08603 |
| 383 | DQcIVDDITYNVN#DTFHK                 | P02751 |
| 384 | VScPIMPcSN#ATVPDGEccPR              | P07996 |
| 385 | KVcQDcPLLAPLN#DTR                   | P02765 |
| 386 | VcqDcPLLAPLN#DTR                    | P02765 |
| 387 | IcDLLVANnHFAHFFAPQN#LTNMNK          | P19827 |
| 388 | GcVLLSYLN#ETVTVSASLESVR             | P01023 |
| 389 | NcGVN#cSGDVFTALIGEIASPnYPKYPENSr    | P09871 |

|     |                                  |        |
|-----|----------------------------------|--------|
| 390 | NcGVN#cSGDVFTALIGEIASPNYPKYPENSR | P09871 |
| 391 | FcRDN#YTDLVAIQNK                 | P14151 |
| 392 | KcGN#eSLTTLKDEDFcK               | P49908 |
| 393 | IcDLLVANNHFAHFFAPQN#LTNmNK       | P19827 |
| 394 | IcDLLVANNHFAHFFAPQN#LTNMNK       | P19827 |
| 395 | GcSSSTSVLLTLDNNVVN#GSSPAIR       | P07996 |
| 396 | GcSSSTSVLLTLDNnVVN#GSSPAIR       | P07996 |
| 397 | VcQDcPLLAPLN#DTR                 | P02765 |
| 398 | GcScFSDWQGPcSVPVpAN#QSFwTR       | O75882 |
| 399 | SPYEMFGDEEVMcLNGN#WTEPPQcK       | P08603 |
| 400 | SPYEMFGDEEVMcLNGN#WTEPPQcK       | Q03591 |
| 401 | SPYEMFGDEEVMcLnGN#WTEPPqcK       | P08603 |
| 402 | SPYEMFGDEEVMcLnGN#WTEPPqcK       | Q03591 |
| 403 | SPYEMFGDEEVMcLnGN#WTEPPQcK       | P08603 |
| 404 | SPYEMFGDEEVMcLnGN#WTEPPQcK       | Q03591 |
| 405 | GLQPTLTNPGEcRPN#FTcAcR           | P04275 |
| 406 | FSLLGHASIScTVEN#ETIGVWRPSpPTcEK  | P04003 |
| 407 | LEPVHLQLQcMSQEQLAQVAAN#ATK       | Q96PD5 |
| 408 | LEPVHLQLQcmSQEQLAQVAAN#ATK       | Q96PD5 |
| 409 | cIqAN#YSLMEnGK                   | P05090 |
| 410 | cATPHGDN#ASLEATFVK               | P23142 |
| 411 | cIQAN#YSLMEnGK                   | P05090 |
| 412 | cIQAN#YSLMEnGKIK                 | P05090 |
| 413 | cIQAN#YSLMENGK                   | P05090 |
| 414 | cFLGN#GTGYR                      | Q04756 |
| 415 | cGN#cSLTTLKDEDFcK                | P49908 |
| 416 | cGN#cSLTTLKDEDFcKR               | P49908 |
| 417 | cSDGWSFDATTLDDN#GTmLFFK          | P02790 |
| 418 | cSDGWSFDATTLDDN#GTMLFFK          | P02790 |

## References:

- (S1) J. Liu, Z. K. Sun, Y. H. Deng, Y. Zou, C. Y. Li, X. H. Guo, L. Q. Xiong, Y. Gao, F. Y. Li and D. Y. Zhao, *Angew. Chem. Int. Ed.*, 2009, **48**, 5875–5879.
- (S2) J. X. Wang, J. Li, Y. N. Wang, M. X. Gao, X. M. Zhang and P. Y. Yang, *ACS Appl. Mater. Interfaces*, 2016, **8**, 27482–27489.
